# Supplementary material
Source: Research Square preprint supplement (doi:10.21203/rs.3.rs-8926341/v1)

Supplementary Material

A Real-World Blueprint for Precision Diabetes Care: Integrating Pharmacogenomics into Clinical Decision-Making for A Chinese T2DM Cohort

# Supplementary Table S1. Comprehensive Interpretation Rulebook: Clinical Rationale and Evidence Grading

This table details the clinical rationale for genotype-to-phenotype mapping and the evidence sources supporting each classification.

| Gene | SNP (rsID) | Phenotype | Genotype | Interpretation (Clinical Mechanism) | Clinical Implication (Ordinal Scale Rationale) | Evidence Source (PharmGKB/Lit) |
| --- | --- | --- | --- | --- | --- | --- |
| TCF7L2 | rs7903146 | T2DM Risk | CC | Normal insulin secretion function. | **Normal:** Standard prevention strategies. | [[31](#_ENREF_31" \o "Guan, 2016 #30)]; [[32](#_ENREF_32" \o "Zhou, 2018 #35)] |
| CT / TT | Reduced insulin secretion; Increased risk. | **Increased Risk:** Enhanced lifestyle intervention. | [[31](#_ENREF_31" \o "Guan, 2016 #30)]; [[32](#_ENREF_32" \o "Zhou, 2018 #35)] |
| TCF7L2 | rs7903146 | SU Efficacy | CC | Normal beta-cell response. | **Normal:** Standard efficacy expected. | PharmGKB |
| CT / TT | Impaired beta-cell function attenuates response. | **Reduced Efficacy:** Consider monitoring. | PharmGKB |
| IRS1 | rs1801278 | Insulin Resistance Risk | CC | Normal insulin sensitivity. | **Normal:** Standard prevention. | [[33](#_ENREF_33" \o "Yousef, 2018 #31)] |
| CT / TT | Reduced insulin sensitivity; Increased risk. | **Increased Risk:** Focus on insulin sensitizers. | [[33](#_ENREF_33" \o "Yousef, 2018 #31)] |
| IRS1 | rs1801278 | SU / Metformin Efficacy | CC | Normal insulin sensitivity. | **Normal:** Standard efficacy. | PharmGKB |
| CT / TT | Reduced insulin sensitivity attenuates response. | **Reduced Efficacy:** Monitor for treatment failure. | PharmGKB |
| CDKAL1 | rs7756992 | DPP-4i Efficacy | AA | Reduced incretin sensitivity (beta-cell defect). | **Reduced Efficacy:** Monitor response closely. | PharmGKB |
| AG | Normal sensitivity. | **Normal:** Standard efficacy. | [[27](#_ENREF_27" \o "Liao, 2017 #11)] |
| GG | Increased sensitivity (High Responder). | **Increased Efficacy:** Good candidate for DPP-4i. | [[27](#_ENREF_27" \o "Liao, 2017 #11)] |
| CDKAL1 | rs7754840 | DPP-4i Efficacy | GG | Reduced incretin sensitivity. | **Reduced Efficacy:** Monitor response closely. | PharmGKB |
| CG | Normal sensitivity. | **Normal:** Standard efficacy. | [[34](#_ENREF_34" \o "Tuerxunyiming, 2015 #32)] |
| CC | Increased sensitivity (High Responder). | **Increased Efficacy:** Good candidate for DPP-4i. | [[34](#_ENREF_34" \o "Tuerxunyiming, 2015 #32)] |
| CYP2C9 | rs1057910 | SU ADR Risk (Hypoglycemia) | *1/*1 (AA) | Normal Metabolism (NM). Normal clearance. | **Normal:** Standard dosing. | PharmGKB |
| *1/*3 (AC) | Intermediate Metabolism (IM). Slower clearance. | **Increased Risk:** Monitor; consider lower dose. | PharmGKB, [[6](#_ENREF_6" \o "Zhou, 2010 #6)] |
| *3/*3 (CC) | Poor Metabolism (PM). Delayed clearance. | **Increased Risk:** Avoid or reduce dose significantly. | PharmGKB, [[6](#_ENREF_6" \o "Zhou, 2010 #6)] |
| SLCO1B1 | rs4149056 | Repaglinide Efficacy | TT | Normal transport function. Normal clearance. | **Normal:** Standard dosing. | PharmGKB |
| CT/ CC | Reduced transport. Increased drug exposure. | **Increased Efficacy/Risk:** Enhanced effect; monitor. | PharmGKB, [[8](#_ENREF_8" \o "He, 2011 #8)] |

Note: "SU" = Sulfonylurea; "ADR" = Adverse Drug Reaction; "DPP-4i" = DPP-4 Inhibitors. Evidence levels sourced from PharmGKB annotations and specific cohort studies cited in the main text.

# Supplementary Table S2. Detailed Genotype and Allele Frequencies and Hardy-Weinberg Equilibrium Test Results

| Gene | SNP | Sample_Size | Type | Variant | Count | Frequency | HWE **χ²** | HWE P-value | HWE_Status |
| --- | --- | --- | --- | --- | --- | --- | --- | --- | --- |
| CYP2C9 | rs1057910 | 908 | Genotype | AA | 819 | 0.90 | 0.75 | 0.39 | In HWE |
| CYP2C9 | rs1057910 | 908 | Genotype | AC | 88 | 0.10 | 0.75 | 0.39 | In HWE |
| CYP2C9 | rs1057910 | 908 | Genotype | CC | 1 | 0.00 | 0.75 | 0.39 | In HWE |
| CYP2C9 | rs1057910 | 1816 | Allele | A | 1726 | 0.95 | 0.75 | 0.39 | In HWE |
| CYP2C9 | rs1057910 | 1816 | Allele | C | 90 | 0.05 | 0.75 | 0.39 | In HWE |
| TCF7L2 | rs7903146 | 908 | Genotype | CC | 829 | 0.91 | 0.36 | 0.55 | In HWE |
| TCF7L2 | rs7903146 | 908 | Genotype | CT | 78 | 0.09 | 0.36 | 0.55 | In HWE |
| TCF7L2 | rs7903146 | 908 | Genotype | TT | 1 | 0.00 | 0.36 | 0.55 | In HWE |
| TCF7L2 | rs7903146 | 1816 | Allele | C | 1736 | 0.96 | 0.36 | 0.55 | In HWE |
| TCF7L2 | rs7903146 | 1816 | Allele | T | 80 | 0.04 | 0.36 | 0.55 | In HWE |
| IRS1 | rs1801278 | 908 | Genotype | CC | 869 | 0.96 | 0.44 | 0.51 | In HWE |
| IRS1 | rs1801278 | 908 | Genotype | CT | 39 | 0.04 | 0.44 | 0.51 | In HWE |
| IRS1 | rs1801278 | 1816 | Allele | C | 1777 | 0.98 | 0.44 | 0.51 | In HWE |
| IRS1 | rs1801278 | 1816 | Allele | T | 39 | 0.02 | 0.44 | 0.51 | In HWE |
| CDKAL1 | rs7754840 | 907 | Genotype | CG | 482 | 0.53 | 3.93 | 0.05 | Deviates from HWE |
| CDKAL1 | rs7754840 | 907 | Genotype | CC | 224 | 0.25 | 3.93 | 0.05 | Deviates from HWE |
| CDKAL1 | rs7754840 | 907 | Genotype | GG | 200 | 0.22 | 3.93 | 0.05 | Deviates from HWE |
| CDKAL1 | rs7754840 | 907 | Genotype | GC | 1 | 0.00 | 3.93 | 0.05 | Deviates from HWE |
| CDKAL1 | rs7754840 | 1814 | Allele | C | 931 | 0.51 | 3.93 | 0.05 | Deviates from HWE |
| CDKAL1 | rs7754840 | 1814 | Allele | G | 883 | 0.49 | 3.93 | 0.05 | Deviates from HWE |
| SLCO1B1 | rs4149056 | 481 | Genotype | TT | 366 | 0.76 | 2.00 | 0.16 | In HWE |
| SLCO1B1 | rs4149056 | 481 | Genotype | CT | 111 | 0.23 | 2.00 | 0.16 | In HWE |
| SLCO1B1 | rs4149056 | 481 | Genotype | CC | 4 | 0.01 | 2.00 | 0.16 | In HWE |
| SLCO1B1 | rs4149056 | 962 | Allele | T | 843 | 0.88 | 2.00 | 0.16 | In HWE |
| SLCO1B1 | rs4149056 | 962 | Allele | C | 119 | 0.12 | 2.00 | 0.16 | In HWE |
| CDKAL1 | rs7756992 | 477 | Genotype | AG | 217 | 0.45 | 2.86 | 0.09 | In HWE |
| CDKAL1 | rs7756992 | 477 | Genotype | GG | 158 | 0.33 | 2.86 | 0.09 | In HWE |
| CDKAL1 | rs7756992 | 477 | Genotype | AA | 102 | 0.21 | 2.86 | 0.09 | In HWE |
| CDKAL1 | rs7756992 | 954 | Allele | A | 421 | 0.44 | 2.86 | 0.09 | In HWE |
| CDKAL1 | rs7756992 | 954 | Allele | G | 533 | 0.56 | 2.86 | 0.09 | In HWE |
| FGG | rs2066865 | 4 | Genotype | TT | 3 | 0.75 | 4 | 0.0455 | Deviates from HWE |
| FGG | rs2066865 | 4 | Genotype | CC | 1 | 0.25 | 4 | 0.0455 | Deviates from HWE |
| FGG | rs2066865 | 8 | Allele | T | 6 | 0.75 | 4 | 0.0455 | Deviates from HWE |
| FGG | rs2066865 | 8 | Allele | C | 2 | 0.25 | 4 | 0.0455 | Deviates from HWE |

# Supplementary Table S3. Comprehensive Results of Genotype-Phenotype Association Analyses

| Gene | SNP | Phenotype | N | Cases | Controls | χ² Statistic | χ² P value | OR （Adjusted） | OR_CI_Lower | OR_CI_Upper | Adjusted | Sig. |
| --- | --- | --- | --- | --- | --- | --- | --- | --- | --- | --- | --- | --- |
| TCF7L2 | rs7903146 | T2DM Risk | 908 | 755 | 153 | 17.53488 | 0.000156 | 32938217 | 0 | inf | 0.990168 | FALSE |
| TCF7L2 | rs7903146 | Sulfonylurea Efficacy | 908 | 47 | 861 | 4.723382 | 0.094261 |  |  |  |  | FALSE |
| IRS1 | rs1801278 | T2DM Risk | 908 | 755 | 153 | 7.049188 | 0.00793 | 1.6E+09 | 0 | inf | 0.998825 | FALSE |
| IRS1 | rs1801278 | Insulin Resistance Risk | 908 | 34 | 874 | 716.1704 | 9.11E-158 | 6450.064 | 617.0103 | 67427.28 | 2.38E-13 | TRUE |
| IRS1 | rs1801278 | Sulfonylurea Efficacy | 908 | 47 | 861 | 1.259009 | 0.261839 | 1.70E-09 | 0 | inf | 0.998995 | FALSE |
| IRS1 | rs1801278 | Metformin Efficacy | 481 | 0 | 481 |  |  | 0.187983 | 0 | inf | 1 | FALSE |
| CYP2C9 | rs1057910 | Sulfonylurea ADR Risk | 908 | 92 | 816 | 875.1738 | 9.09E-191 | 7.74E+14 | 0 | inf | 0.999838 | FALSE |
| CDKAL1 | rs7756992 | T2DM Risk | 477 | 429 | 48 | 176.0537 | 5.89E-39 | 92.35397 | 21.93986 | 388.7562 | 6.78E-10 | TRUE |
| CDKAL1 | rs7756992 | DPP4i Efficacy | 477 | 167 | 310 | 381.8782 | 1.19E-83 | 226.0514 | 94.65961 | 539.821 | 2.91E-34 | TRUE |
| CDKAL1 | rs7754840 | T2DM Risk | 907 | 755 | 152 | 613.2641 | 1.34E-132 | 0.044471 | 0.02467 | 0.080168 | 4.03E-25 | TRUE |
| CDKAL1 | rs7754840 | DPP4i Efficacy | 907 | 281 | 626 | 631.4838 | 1.51E-136 | 0.003367 | 0.001332 | 0.00851 | 2.29E-33 | TRUE |
| SLCO1B1 | rs4149056 | Repaglinide Efficacy | 481 | 114 | 367 | 453.8592 | 2.79E-99 | 9.18E-05 | 9.45E-06 | 0.000892 | 1.13E-15 | TRUE |
| SLCO1B1 | rs4149056 | Rosiglitazone Efficacy | 481 | 114 | 367 | 453.8592 | 2.79E-99 | 9.18E-05 | 9.45E-06 | 0.000892 | 1.13E-15 | TRUE |

*Note: OR = Odds Ratio (adjusted for age and sex). Extremely high or low ORs indicate quasi-complete separation, confirming the deterministic nature of the genotype-to-phenotype mapping.*

# Supplementary Table S4. Detailed Results of the T2DM PRS Analysis

| Category | Metric | Value | P_value | Confidence_Interval | Notes |
| --- | --- | --- | --- | --- | --- |
| Sample Size | Total samples | 908 |  |  | Original dataset |
| Sample Size | Valid PRS samples | 908 |  |  | Non-missing genotype data |
| PRS Statistics | Weighted PRS mean | 2.227093 |  | SD: 1.577 | Descriptive statistics |
| Age Association | Pearson correlation | -0.05945 | 0.073377 |  | n = 908 |
| Gender Association | T-test difference |  | 0.000198 | Male: 2.079, Female: 2.482 | n_male = 575, n_female = 333 |
| T2DM Risk Association | Odds Ratio | 373.2776 | 2.25E-28 | 130.538-1067.401 | Logistic regression |
| Predictive Performance | ROC AUC | 0.990439 |  |  | Area under ROC curve |

*Note: PRS = Polygenic Risk Score; AUC = Area Under the Receiver Operating Characteristic Curve. The high AUC validates the internal consistency of the risk stratification model.*

# Supplementary Table S5. Comprehensive Gene-Gene Interaction Analysis Results

| Gene Interaction | Pathway | N | OR | 95% CI | P-int | ΔAIC | Sig | Pattern |
| --- | --- | --- | --- | --- | --- | --- | --- | --- |
| TCF7L2 × CDKAL1 | Beta-cell function & In | 907 | 1.989 | (0.59–6.71) | 0.3178 | 1.00 | No | Synergistic |
| CYP2C9 × SLCO1B1 | Drug metabolism & Trans | 481 | 0.000 | (0.00–inf) | 0.1887 | 0.27 | No | Antagonistic |
| CDKAL1 (rs7756992) × CDKAL1 (rs7754840) | Intragenic epistasis | 476 | 8.212 | (1.52–44.27) | 0.0051 | -5.84 | Yes | Synergistic |
| TCF7L2 × SLCO1B1 | Beta-cell function & Dr | 481 | 1114901.413 | (0.00–inf) | 0.4349 | 1.39 | No | Synergistic |

*Note: P-int = P-value for interaction term. The significant CDKAL1 intragenic interaction (P = 0.005) should be interpreted with caution due to limited sample sizes in some genotype combinations (see Table S6).*

# Supplementary Table S6. Contingency Table for CDKAL1 Joint Genotypes

The joint distribution of CDKAL1 rs7756992 and rs7754840 genotypes among 476 patients with complete data for both loci.

|  | rs7754840 CC | rs7754840 CG | rs7754840 GG | Total |
| --- | --- | --- | --- | --- |
| rs7756992 AA | 2 (0.4%) | 46 (9.7%) | 54 (11.3%) | 102 (21.4%) |
| rs7756992 AG | 16 (3.4%) | 179 (37.6%) | 21 (4.4%) | 216 (45.4%) |
| rs7756992 GG | 91 (19.1%) | 60 (12.6%) | 7 (1.5%) | 158 (33.2%) |
| Total | 109 (22.9%) | 285 (59.9%) | 82 (17.2%) | 476 (100.0%) |

*Note: Values are presented as n (%). rs7756992 genotypes: AA = reduced incretin sensitivity (risk), AG = normal, GG = increased sensitivity. rs7754840 genotypes: CC = increased T2DM risk, CG = increased risk, GG = normal. Small cell sizes (n < 10) indicate limited statistical power for interaction stability.*

# Supplementary Figure S1

**Supplementary Figure S1. Assessment of gene-gene interactions on predicted pharmacogenomic outcomes.** (a) Gene-Gene Interaction Significance: Bar plot showing -log10(P-values) for each tested interaction, with significance thresholds indicated by dashed lines (P = 0.05 and P = 0.01). The CDKAL1 intragenic interaction (rs7756992 × rs7754840) demonstrates the strongest statistical signal. (b) Model Improvement Assessment: ΔAIC values comparing models with and without interaction terms; negative values indicate improved model fit. (c) Interaction Effect Sizes (Forest Plot): Interaction Odds Ratios with 95% confidence intervals on a logarithmic scale. The vertical line at OR = 1 indicates no interaction effect. (d) Interactions by Biological Pathway: Distribution of tested interactions across four biological pathway categories. (e) Interaction Strength Heatmap: Matrix displaying effect sizes, statistical significance, and model improvement metrics for each interaction. (f) Sample Sizes for Interaction Tests: Bar plot showing the number of complete cases available for each interaction analysis. (g) Statistical Power Assessment: Distribution of interaction tests by statistical power category based on sample size. (h) Analysis Summary: Pie chart summarizing the proportion of significant interactions (P < 0.05), strong interactions (P < 0.01), and models showing improvement (ΔAIC < -2).


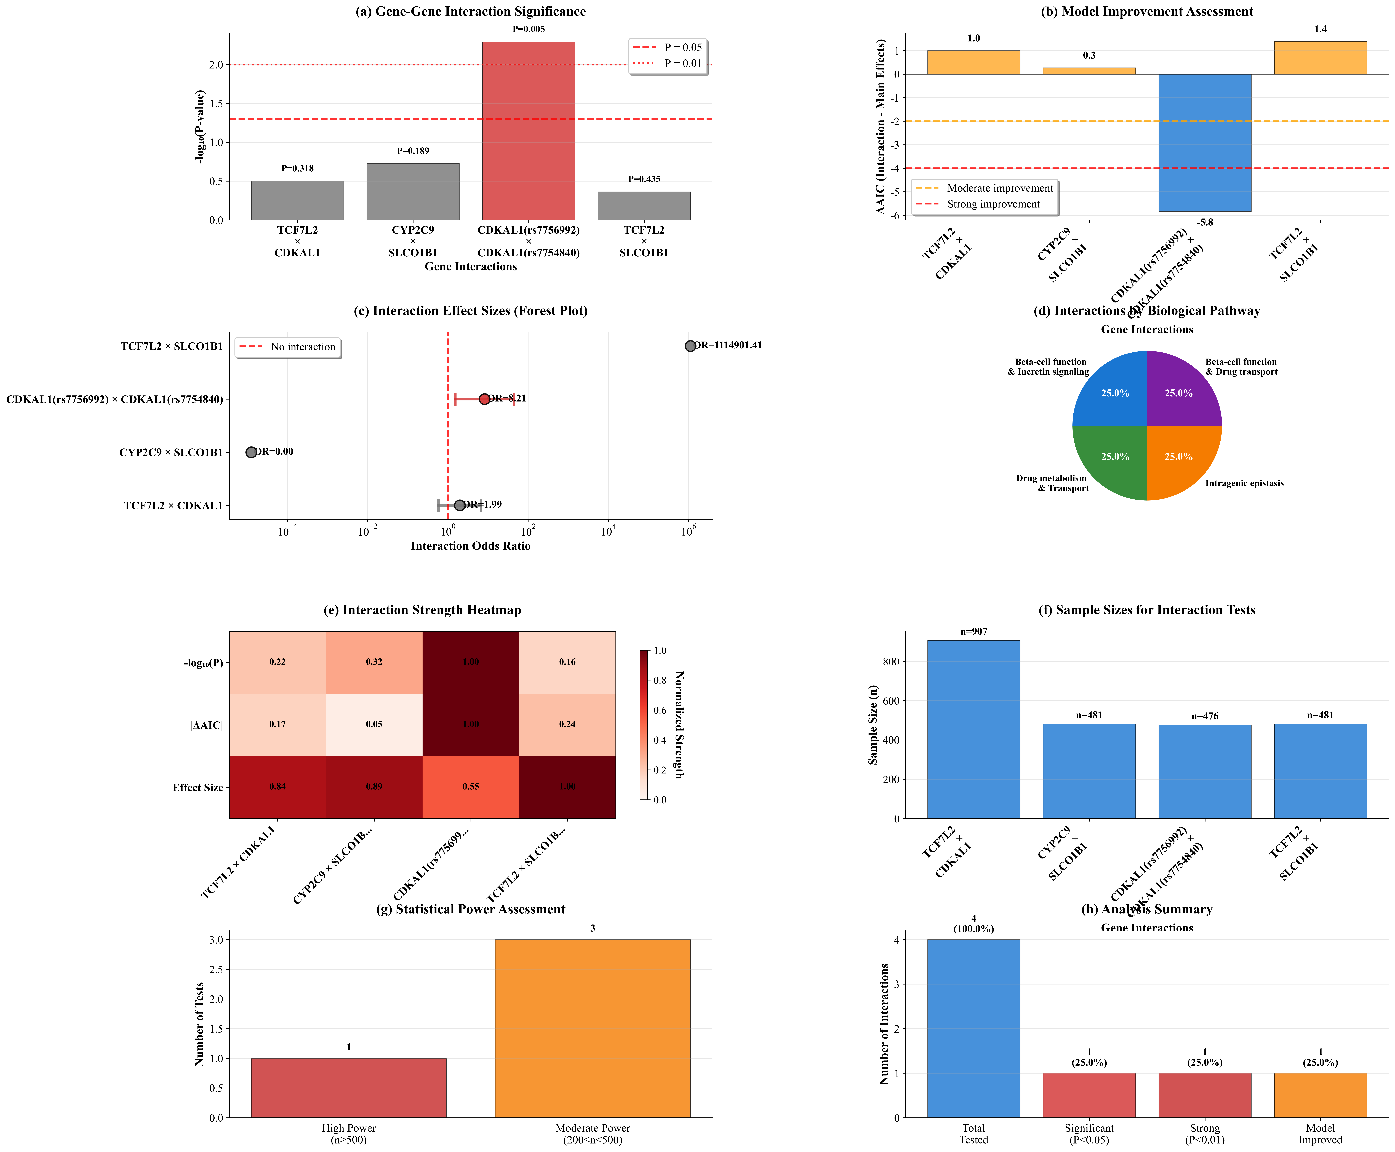

Supplement: Supplementary file 1 [file 10865db6f4decc773425b71e.docx]
